# Supplementary material
Source: ML conference proceedings conference paper supplement (https://openreview.net/forum?id=O7IN4nsaIO)
Supplement: supplementary_material [file my_graph_exp_graph_8.xlsx]

## Sheet: Sheet1
0.25	0	0	0	0.25	0	0.25	0.25
0.25	0.25	0	0	0	0.25	0	0.25
0.25	0.25	0.25	0	0	0	0.25	0
0	0.25	0.25	0.25	0	0	0	0.25
0.25	0	0.25	0.25	0.25	0	0	0
0	0.25	0	0.25	0.25	0.25	0	0
0	0	0.25	0	0.25	0.25	0.25	0
0	0	0	0.25	0	0.25	0.25	0.25
